# Supplementary material
Source: publisher site journal article supplement (https://www.spandidos-publications.com/5312/downloadSupplementary)

Figure S1. Cell culture results in the experiment and the DMEM+FBS control group. (A) General design of the experiment. Cell samples from bronchoscopic brushing were seeded in the medium and subsequently amplified. (B) Proliferation curve of basal cells in the novel SFM and the DMEM + FBS group. (C) Brightfield microscopy images of cell colonies in the novel SFM and DMEM + FBS. Top row scale bar, 250  $\mu\text{m}$ ; bottom row scale bar, 100  $\mu\text{m}$ . \*\* $P < 0.01$ . DMEM, Dulbecco's modified eagle medium; FBS, fetal bovine serum; SFM, serum-free medium.

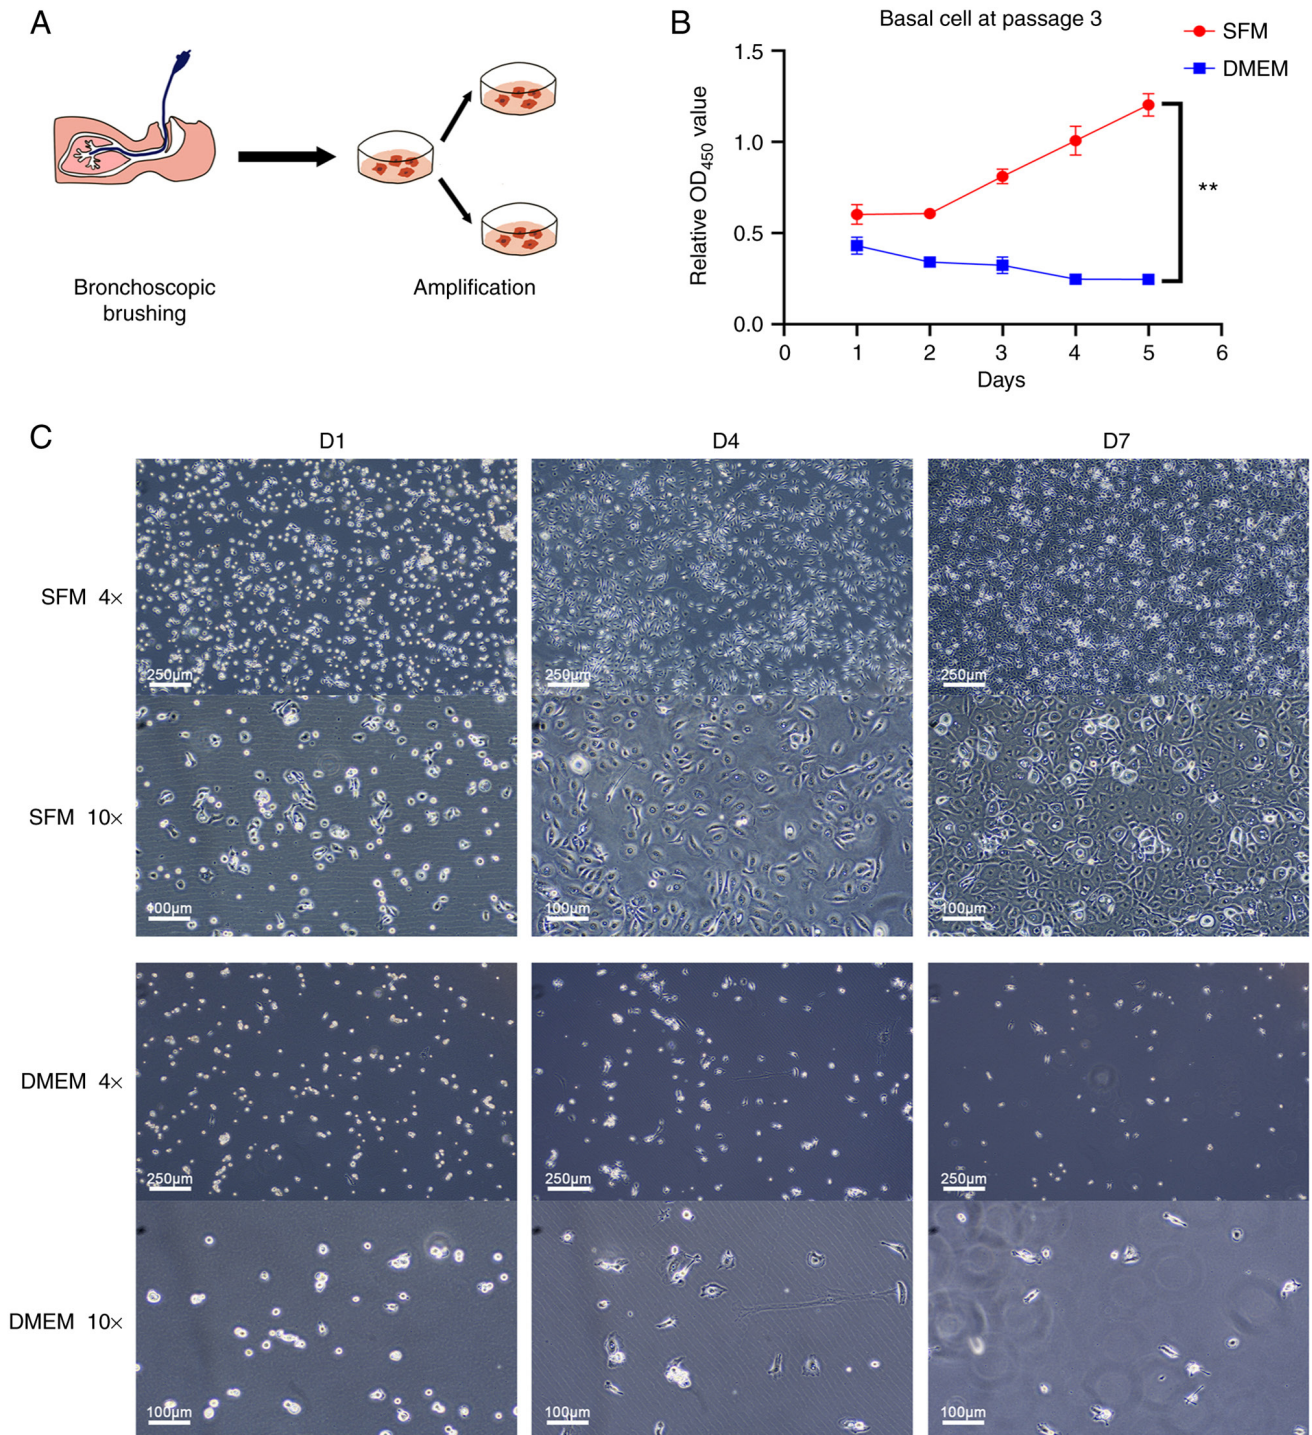

Supplement: Supplementary file 1 [file downloadSupplementary]
